# Supplementary material for: A bidirectional Mendelian randomisation study to evaluate the relationship between body constitution and hearing loss
Source: PubMed Central journal article supplement (PMC10611773; doi:10.1038/s41598-023-44735-x), 2023-10-27
Supplement: 41598_2023_44735_MOESM1_ESM.pdf [file 41598_2023_44735_MOESM1_ESM.pdf]

## Supplements

### A bidirectional Mendelian randomisation study to evaluate the relationship between body constitution and hearing loss

*Yiyang He, Ville Karhunen, Anna Pulakka, Marko Kantomaa, Sylvain Sebert*

#### Contents

|                                                                                                                                                                                                                  |    |
|------------------------------------------------------------------------------------------------------------------------------------------------------------------------------------------------------------------|----|
| <b>Supplementary Table 1.</b> Numbers of SNPs used as genetic instrumental variables and F statistics for each pair of exposure and outcome in IVW, MR-Egger, weighted median and weighted mode MR analyses..... | 2  |
| <b>Supplementary Table 2.</b> Results of colocalisation analysis.....                                                                                                                                            | 2  |
| <b>Supplementary Table 3.</b> Effect estimates from forward MR analyses for body mass index, waist circumference, and body fat percentage with various hearing loss diseases .....                               | 3  |
| <b>Supplementary Table 4.</b> Effect estimates from forward MR sensitivity analyses for adult body mass index, waist circumference, and body fat percentage with various hearing loss diseases .....             | 4  |
| <b>Supplementary Table 5.</b> Effect estimates from reverse MR analyses for sensorineural hearing loss, noise-induced hearing loss and age-related hearing impairment with body constitution .....               | 6  |
| <b>Supplementary Table 6.</b> Effect estimates from reverse MR sensitivity analyses for sensorineural hearing loss, noise-induced hearing loss and age-related hearing impairment with body constitution .....   | 7  |
| <b>Supplementary Figure 1</b> Forest plot showing the complementary Mendelian randomization estimates for the association between genetically proxied body constitution and the risk of hearing loss .....       | 9  |
| <b>Supplementary Figure 2</b> Forest plot showing the complementary Mendelian randomization estimates for the association between genetically proxied hearing loss traits and body constitution.....             | 10 |
| <b>Supplementary Figure 3</b> Funnel plot for MR analysis of age-related hearing impairment and body mass index.....                                                                                             | 11 |
| <b>Supplementary Figure 4</b> Leave-one-out analysis for age-related hearing impairment liability and body mass index.....                                                                                       | 12 |
| <b>Supplementary Figure 5</b> Three scenarios of shared causal variant (colocalisation) between body mass index and age-related hearing impairment.....                                                          | 13 |

**Supplementary Table 1.** Numbers of SNPs used as genetic instrumental variables and F statistics for each pair of exposure and outcome in IVW, MR-Egger, weighted median and weighted mode MR analyses

| Outcomes                       | Body mass index            |        |                         | Waist circumference        |        |                         | Body Fat percentage            |        |                         |
|--------------------------------|----------------------------|--------|-------------------------|----------------------------|--------|-------------------------|--------------------------------|--------|-------------------------|
|                                | pval                       | N_SNPs | Median <i>F</i> (range) | pval                       | N_SNPs | Median <i>F</i> (range) | pval                           | N_SNPs | Median <i>F</i> (range) |
| Sensorineural hearing loss     | 5E-08                      | 89     | 62 (30–294)             | 5E-08                      | 72     | 53 (30–223)             | 5E-08                          | 85     | 53 (30–180)             |
| Noise-induced hearing loss     | 5E-08                      | 89     | 62 (30–294)             | 5E-08                      | 72     | 53 (30–223)             | 5E-08                          | 85     | 53 (30–180)             |
| Age-related hearing impairment | 5E-08                      | 68     | 67 (29–688)             | 5E-08                      | 41     | 60 (29–447)             | 5E-08                          | 87     | 52 (30–180)             |
| Outcomes                       | Sensorineural hearing loss |        |                         | Noise-induced hearing loss |        |                         | Age-related hearing impairment |        |                         |
|                                | pval                       | N_SNPs | Median <i>F</i> (range) | pval                       | N_SNPs | Median <i>F</i> (range) | pval                           | N_SNPs | Median <i>F</i> (range) |
| Body mass index                | 5E-05                      | 26     | 20 (17–45)              | 5E-05                      | 17     | 19 (18–23)              | 5E-08                          | 32     | 42 (30–91)              |
| Waist circumference            | 5E-05                      | 25     | 20 (17–45)              | 5E-05                      | 17     | 19 (18–23)              | 5E-08                          | 32     | 42 (30–91)              |
| Body Fat percentage            | 5E-05                      | 25     | 20 (17–45)              | 5E-05                      | 17     | 19 (18–23)              | 5E-08                          | 7      | 37 (30–45)              |

Abbreviations: pval P value threshold used for selecting instrumental variants, SNPs single nucleotide polymorphisms, MR Mendelian Randomisation

**Supplementary Table 2.** Results of colocalisation analysis

| Models | Posterior Probabilities |
|--------|-------------------------|
| H0     | 0.00000                 |
| H1     | 0.00006                 |
| H2     | 0.00000                 |
| H3     | 0.07980                 |
| H4     | 0.92000                 |

**Supplementary Table 3.** Effect estimates from forward MR analyses for body mass index, waist circumference, and body fat percentage with various hearing loss diseases

| Exposure            | Outcome                        | Method                    | OR   | lo_ci | up_ci | pval  | Phet |
|---------------------|--------------------------------|---------------------------|------|-------|-------|-------|------|
| Body mass index     | Sensorineural hearing loss     | Inverse variance weighted | 1.01 | 0.88  | 1.16  | 0.923 | 0.20 |
| Body mass index     | Noise-induced hearing loss     | Inverse variance weighted | 1.44 | 0.76  | 2.73  | 0.268 | 0.85 |
| Body mass index     | Age-related hearing impairment | Inverse variance weighted | 0.99 | 0.97  | 1.00  | 0.108 | 0.00 |
| Waist circumference | Sensorineural hearing loss     | Inverse variance weighted | 1.00 | 0.84  | 1.20  | 0.960 | 0.54 |
| Waist circumference | Noise-induced hearing loss     | Inverse variance weighted | 0.89 | 0.37  | 2.15  | 0.802 | 0.46 |
| Waist circumference | Age-related hearing impairment | Inverse variance weighted | 0.98 | 0.96  | 1.00  | 0.087 | 0.00 |
| Body fat percentage | Sensorineural hearing loss     | Inverse variance weighted | 0.85 | 0.69  | 1.06  | 0.146 | 0.06 |
| Body fat percentage | Noise-induced hearing loss     | Inverse variance weighted | 1.40 | 0.56  | 3.51  | 0.477 | 0.67 |
| Body fat percentage | Age-related hearing impairment | Inverse variance weighted | 1.04 | 1.01  | 1.06  | 0.003 | 0.02 |

Phet: P-values of Chi-square Q test for heterogeneity. Abbreviations: MR Mendelian Randomisation, OR odds ratio, 95 % CI confidence intervals, p/pval P value, het heterogeneity

**Supplementary Table 4.** Effect estimates from forward MR sensitivity analyses for adult body mass index, waist circumference, and body fat percentage with various hearing loss diseases

| Exposure            | Outcome                        | Method                    | SNPs | OR      | or_lci95 | or_uci95 | pval    | int      | p_pleiotropy |
|---------------------|--------------------------------|---------------------------|------|---------|----------|----------|---------|----------|--------------|
| Body mass index     | Sensorineural hearing loss     | MR Egger                  | 89   | 1.30917 | 0.88630  | 1.93381  | 0.17939 | -0.00589 | 0.16157      |
| Body mass index     | Sensorineural hearing loss     | Inverse variance weighted | 89   | 1.00694 | 0.87537  | 1.15828  | 0.92292 | NA       | NA           |
| Body mass index     | Sensorineural hearing loss     | Weighted mode             | 89   | 0.93768 | 0.67361  | 1.30528  | 0.70391 | NA       | NA           |
| Body mass index     | Sensorineural hearing loss     | Weighted median           | 89   | 0.97385 | 0.79387  | 1.19463  | 0.79937 | NA       | NA           |
| Body mass index     | Noise-induced hearing loss     | MR Egger                  | 89   | 0.57076 | 0.09429  | 3.45490  | 0.54317 | 0.02072  | 0.28469      |
| Body mass index     | Noise-induced hearing loss     | Inverse variance weighted | 89   | 1.43762 | 0.75598  | 2.73386  | 0.26832 | NA       | NA           |
| Body mass index     | Noise-induced hearing loss     | Weighted mode             | 89   | 0.83938 | 0.14699  | 4.79309  | 0.84430 | NA       | NA           |
| Body mass index     | Noise-induced hearing loss     | Weighted median           | 89   | 1.49129 | 0.55716  | 3.99156  | 0.42626 | NA       | NA           |
| Body mass index     | Age-related hearing impairment | MR Egger                  | 68   | 0.93964 | 0.90697  | 0.97349  | 0.00099 | 0.00159  | 0.00363      |
| Body mass index     | Age-related hearing impairment | Inverse variance weighted | 68   | 0.98762 | 0.97274  | 1.00273  | 0.10790 | NA       | NA           |
| Body mass index     | Age-related hearing impairment | Weighted mode             | 68   | 0.98785 | 0.93632  | 1.04222  | 0.65617 | NA       | NA           |
| Body mass index     | Age-related hearing impairment | Weighted median           | 68   | 0.98795 | 0.96782  | 1.00850  | 0.24832 | NA       | NA           |
| Body mass index     | Age-related hearing impairment | MR-PRESSO                 | 66   | 0.99783 | 0.98464  | 1.01120  | 0.75028 | NA       | NA           |
| Waist circumference | Sensorineural hearing loss     | MR Egger                  | 72   | 1.08024 | 0.60848  | 1.91777  | 0.79289 | -0.00133 | 0.79482      |
| Waist circumference | Sensorineural hearing loss     | Inverse variance weighted | 72   | 1.00459 | 0.83942  | 1.20225  | 0.96017 | NA       | NA           |
| Waist circumference | Sensorineural hearing loss     | Weighted mode             | 72   | 0.91174 | 0.56758  | 1.46458  | 0.70352 | NA       | NA           |
| Waist circumference | Sensorineural hearing loss     | Weighted median           | 72   | 0.96823 | 0.73781  | 1.27061  | 0.81589 | NA       | NA           |
| Waist circumference | Noise-induced hearing loss     | MR Egger                  | 72   | 0.95754 | 0.05686  | 16.12479 | 0.97606 | -0.00126 | 0.96003      |
| Waist circumference | Noise-induced hearing loss     | Inverse variance weighted | 72   | 0.89385 | 0.37174  | 2.14932  | 0.80206 | NA       | NA           |
| Waist circumference | Noise-induced hearing loss     | Weighted mode             | 72   | 0.68089 | 0.04909  | 9.44430  | 0.77536 | NA       | NA           |
| Waist circumference | Noise-induced hearing loss     | Weighted median           | 72   | 0.93072 | 0.24188  | 3.58130  | 0.91683 | NA       | NA           |

|                     |                                |                           |    |         |         |          |         |          |         |
|---------------------|--------------------------------|---------------------------|----|---------|---------|----------|---------|----------|---------|
| Waist circumference | Age-related hearing impairment | MR Egger                  | 41 | 0.89027 | 0.84653 | 0.93628  | 0.00006 | 0.00308  | 0.00023 |
| Waist circumference | Age-related hearing impairment | Inverse variance weighted | 41 | 0.98070 | 0.95908 | 1.00281  | 0.08664 | NA       | NA      |
| Waist circumference | Age-related hearing impairment | Weighted mode             | 41 | 0.98196 | 0.91490 | 1.05393  | 0.61667 | NA       | NA      |
| Waist circumference | Age-related hearing impairment | Weighted median           | 41 | 0.98436 | 0.95902 | 1.01037  | 0.23617 | NA       | NA      |
| Waist circumference | Age-related hearing impairment | MR-PRESSO                 | 39 | 0.99461 | 0.97559 | 1.01401  | 0.58672 | NA       | NA      |
| Body fat percentage | Sensorineural hearing loss     | MR Egger                  | 85 | 1.31098 | 0.63659 | 2.69982  | 0.46462 | -0.00645 | 0.22777 |
| Body fat percentage | Sensorineural hearing loss     | Inverse variance weighted | 85 | 0.85431 | 0.69108 | 1.05609  | 0.14551 | NA       | NA      |
| Body fat percentage | Sensorineural hearing loss     | Weighted mode             | 85 | 0.94407 | 0.54408 | 1.63813  | 0.83831 | NA       | NA      |
| Body fat percentage | Sensorineural hearing loss     | Weighted median           | 85 | 0.86983 | 0.65358 | 1.15763  | 0.33893 | NA       | NA      |
| Body fat percentage | Noise-induced hearing loss     | MR Egger                  | 85 | 0.94586 | 0.04074 | 21.95733 | 0.97241 | 0.00588  | 0.80005 |
| Body fat percentage | Noise-induced hearing loss     | Inverse variance weighted | 85 | 1.39676 | 0.55626 | 3.50725  | 0.47685 | NA       | NA      |
| Body fat percentage | Noise-induced hearing loss     | Weighted mode             | 85 | 1.88896 | 0.13125 | 27.18679 | 0.64137 | NA       | NA      |
| Body fat percentage | Noise-induced hearing loss     | Weighted median           | 85 | 1.74865 | 0.48888 | 6.25464  | 0.39010 | NA       | NA      |
| Body fat percentage | Age-related hearing impairment | MR Egger                  | 87 | 0.96954 | 0.89287 | 1.05279  | 0.46378 | 0.00103  | 0.09418 |
| Body fat percentage | Age-related hearing impairment | Inverse variance weighted | 87 | 1.03769 | 1.01233 | 1.06369  | 0.00338 | NA       | NA      |
| Body fat percentage | Age-related hearing impairment | Weighted mode             | 87 | 0.96885 | 0.88805 | 1.05701  | 0.47831 | NA       | NA      |
| Body fat percentage | Age-related hearing impairment | Weighted median           | 87 | 1.01730 | 0.98343 | 1.05233  | 0.32080 | NA       | NA      |

NA indicate not applicable. OR: odds ratio. Int: the intercept of MR-Egger regression; MR-PRESSO: Mendelian Randomization Pleiotropy RESidual Sum and Outlier. SNPs single nucleotide polymorphisms.

**Supplementary Table 5.** Effect estimates from reverse MR analyses for sensorineural hearing loss, noise-induced hearing loss and age-related hearing impairment with body constitution

| Exposure                       | Outcome             | Method                    | beta   | lo_ci  | up_ci  | pval  | <i>P</i> <sub>het</sub> |
|--------------------------------|---------------------|---------------------------|--------|--------|--------|-------|-------------------------|
| Sensorineural hearing loss     | Body mass index     | Inverse variance weighted | -0.009 | -0.029 | 0.010  | 0.351 | 0.006                   |
| Sensorineural hearing loss     | Waist circumference | Inverse variance weighted | -0.010 | -0.028 | 0.009  | 0.305 | 0.001                   |
| Sensorineural hearing loss     | Body fat percentage | Inverse variance weighted | 0.000  | -0.014 | 0.014  | 0.998 | 0.027                   |
| Noise-induced hearing loss     | Body mass index     | Inverse variance weighted | 0.001  | -0.004 | 0.005  | 0.766 | 0.187                   |
| Noise-induced hearing loss     | Waist circumference | Inverse variance weighted | 0.000  | -0.003 | 0.004  | 0.916 | 0.436                   |
| Noise-induced hearing loss     | Body fat percentage | Inverse variance weighted | 0.001  | -0.002 | 0.004  | 0.634 | 0.295                   |
| Age-related hearing impairment | Body mass index     | Inverse variance weighted | -0.221 | -0.436 | -0.007 | 0.043 | 0.001                   |
| Age-related hearing impairment | Waist circumference | Inverse variance weighted | -0.129 | -0.346 | 0.088  | 0.245 | 0.031                   |
| Age-related hearing impairment | Body fat percentage | Inverse variance weighted | -0.225 | -0.447 | -0.003 | 0.047 | 0.090                   |

*P*<sub>het</sub>: P-values of Chi-square Q test for heterogeneity. Abbreviations: MR Mendelian Randomisation, 95 % CI confidence intervals

**Supplementary Table 6.** Effect estimates from reverse MR sensitivity analyses for sensorineural hearing loss, noise-induced hearing loss and age-related hearing impairment with body constitution

| Exposure                   | Outcome             | Method                    | SNPs | beta     | lo_ci    | up_ci    | pval    | int      | p_pleiotropy |
|----------------------------|---------------------|---------------------------|------|----------|----------|----------|---------|----------|--------------|
| Sensorineural hearing loss | Body mass index     | MR Egger                  | 25   | 0.00134  | -0.03036 | 0.03303  | 0.93492 | -0.00128 | 0.40029      |
| Sensorineural hearing loss | Body mass index     | Inverse variance weighted | 25   | -0.00943 | -0.02928 | 0.01041  | 0.35149 | NA       | NA           |
| Sensorineural hearing loss | Body mass index     | Weighted mode             | 25   | 0.00114  | -0.02576 | 0.02803  | 0.93475 | NA       | NA           |
| Sensorineural hearing loss | Body mass index     | Weighted median           | 25   | -0.00529 | -0.02780 | 0.01721  | 0.64490 | NA       | NA           |
| Sensorineural hearing loss | Waist circumference | MR Egger                  | 25   | -0.00609 | -0.03619 | 0.02401  | 0.69519 | -0.00043 | 0.76308      |
| Sensorineural hearing loss | Waist circumference | Inverse variance weighted | 25   | -0.00973 | -0.02832 | 0.00886  | 0.30477 | NA       | NA           |
| Sensorineural hearing loss | Waist circumference | Weighted mode             | 25   | -0.00516 | -0.02607 | 0.01575  | 0.63274 | NA       | NA           |
| Sensorineural hearing loss | Waist circumference | Weighted median           | 25   | -0.00628 | -0.02634 | 0.01379  | 0.53966 | NA       | NA           |
| Sensorineural hearing loss | Waist circumference | MR-PRESSO                 | 24   | -0.01479 | -0.02951 | -0.00007 | 0.06097 | NA       | NA           |
| Sensorineural hearing loss | Body fat percentage | MR Egger                  | 25   | 0.00632  | -0.01639 | 0.02902  | 0.59076 | -0.00075 | 0.49077      |
| Sensorineural hearing loss | Body fat percentage | Inverse variance weighted | 25   | 0.00001  | -0.01413 | 0.01416  | 0.99841 | NA       | NA           |
| Sensorineural hearing loss | Body fat percentage | Weighted mode             | 25   | 0.00009  | -0.02136 | 0.02153  | 0.99374 | NA       | NA           |
| Sensorineural hearing loss | Body fat percentage | Weighted median           | 25   | -0.00359 | -0.02055 | 0.01337  | 0.67822 | NA       | NA           |
| Noise-induced hearing loss | Body mass index     | MR Egger                  | 17   | 0.00178  | -0.00665 | 0.01022  | 0.68404 | -0.00058 | 0.76381      |
| Noise-induced hearing loss | Body mass index     | Inverse variance weighted | 17   | 0.00069  | -0.00385 | 0.00523  | 0.76601 | NA       | NA           |
| Noise-induced hearing loss | Body mass index     | Weighted mode             | 17   | 0.00372  | -0.00478 | 0.01222  | 0.40389 | NA       | NA           |
| Noise-induced hearing loss | Body mass index     | Weighted median           | 17   | 0.00195  | -0.00421 | 0.00810  | 0.53588 | NA       | NA           |
| Noise-induced hearing loss | Waist circumference | MR Egger                  | 17   | -0.00371 | -0.01007 | 0.00266  | 0.27153 | 0.00205  | 0.16939      |
| Noise-induced hearing loss | Waist circumference | Inverse variance weighted | 17   | 0.00019  | -0.00337 | 0.00375  | 0.91551 | NA       | NA           |
| Noise-induced hearing loss | Waist circumference | Weighted mode             | 17   | -0.00225 | -0.00898 | 0.00448  | 0.52206 | NA       | NA           |
| Noise-induced hearing loss | Waist circumference | Weighted median           | 17   | -0.00196 | -0.00702 | 0.00309  | 0.44627 | NA       | NA           |
| Noise-induced hearing loss | Body fat percentage | MR Egger                  | 17   | 0.00012  | -0.00596 | 0.00620  | 0.97056 | 0.00036  | 0.79574      |
| Noise-induced hearing loss | Body fat percentage | Inverse variance weighted | 17   | 0.00080  | -0.00248 | 0.00407  | 0.63370 | NA       | NA           |

|                                |                     |                           |    |          |          |          |         |          |         |
|--------------------------------|---------------------|---------------------------|----|----------|----------|----------|---------|----------|---------|
| Noise-induced hearing loss     | Body fat percentage | Weighted mode             | 17 | -0.00185 | -0.00801 | 0.00431  | 0.56448 | NA       | NA      |
| Noise-induced hearing loss     | Body fat percentage | Weighted median           | 17 | -0.00085 | -0.00515 | 0.00345  | 0.69848 | NA       | NA      |
| Age-related hearing impairment | Body mass index     | MR Egger                  | 32 | -0.37731 | -1.48376 | 0.72913  | 0.50900 | 0.00145  | 0.77978 |
| Age-related hearing impairment | Body mass index     | Inverse variance weighted | 32 | -0.22116 | -0.43569 | -0.00664 | 0.04332 | NA       | NA      |
| Age-related hearing impairment | Body mass index     | Weighted mode             | 32 | -0.26290 | -0.64600 | 0.12021  | 0.18838 | NA       | NA      |
| Age-related hearing impairment | Body mass index     | Weighted median           | 32 | -0.20823 | -0.44418 | 0.02771  | 0.08367 | NA       | NA      |
| Age-related hearing impairment | Waist circumference | MR Egger                  | 32 | -0.09973 | -1.22025 | 1.02078  | 0.86268 | -0.00027 | 0.95899 |
| Age-related hearing impairment | Waist circumference | Inverse variance weighted | 32 | -0.12880 | -0.34584 | 0.08824  | 0.24477 | NA       | NA      |
| Age-related hearing impairment | Waist circumference | Weighted mode             | 32 | -0.22868 | -0.63148 | 0.17411  | 0.27436 | NA       | NA      |
| Age-related hearing impairment | Waist circumference | Weighted median           | 32 | -0.19574 | -0.45607 | 0.06458  | 0.14055 | NA       | NA      |
| Age-related hearing impairment | Waist circumference | MR-PRESSO                 | 31 | -0.08771 | -0.28708 | 0.11166  | 0.39538 | NA       | NA      |
| Age-related hearing impairment | Body fat percentage | MR Egger                  | 7  | 0.25397  | -0.86211 | 1.37005  | 0.67424 | -0.00429 | 0.42955 |
| Age-related hearing impairment | Body fat percentage | Inverse variance weighted | 7  | -0.22497 | -0.44717 | -0.00276 | 0.04722 | NA       | NA      |
| Age-related hearing impairment | Body fat percentage | Weighted mode             | 7  | -0.05402 | -0.38922 | 0.28119  | 0.76283 | NA       | NA      |
| Age-related hearing impairment | Body fat percentage | Weighted median           | 7  | -0.08103 | -0.31527 | 0.15320  | 0.49773 | NA       | NA      |

NA indicate not applicable. Int: the intercept of MR-Egger regression; ci: confidence interval (95%); MR-PRESSO: Mendelian Randomization Pleiotropy RESidual Sum and Outlier. SNPs single nucleotide polymorphisms



**Supplementary Figure 1** Forest plot showing the complementary Mendelian randomization estimates for the association between genetically proxied body constitution and the risk of hearing loss

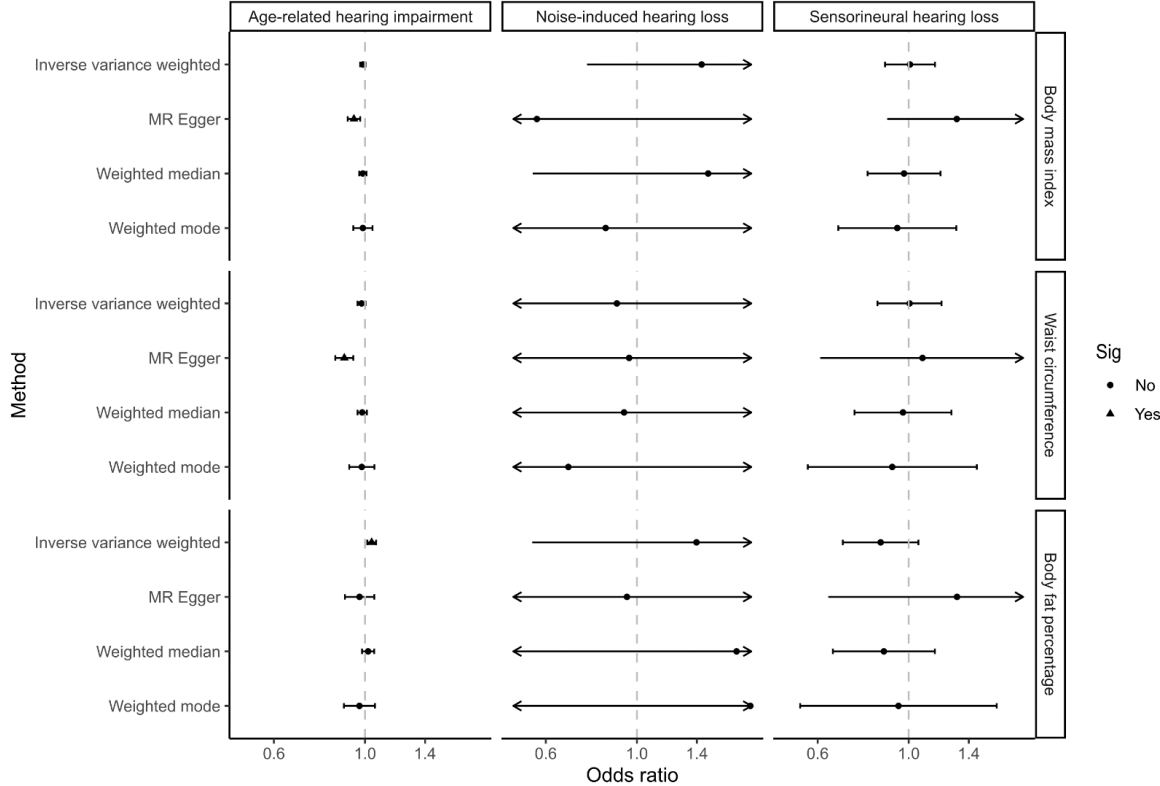

MR-Egger: Mendelian randomisation Egger. Sig: significance (p-value < 0.5). Odds ratio (OR) with 95% confidence interval. Arrows indicate 0.3>OR or OR>2.0

**Supplementary Figure 2** Forest plot showing the complementary Mendelian randomization estimates for the association between genetically proxied hearing loss traits and body constitution

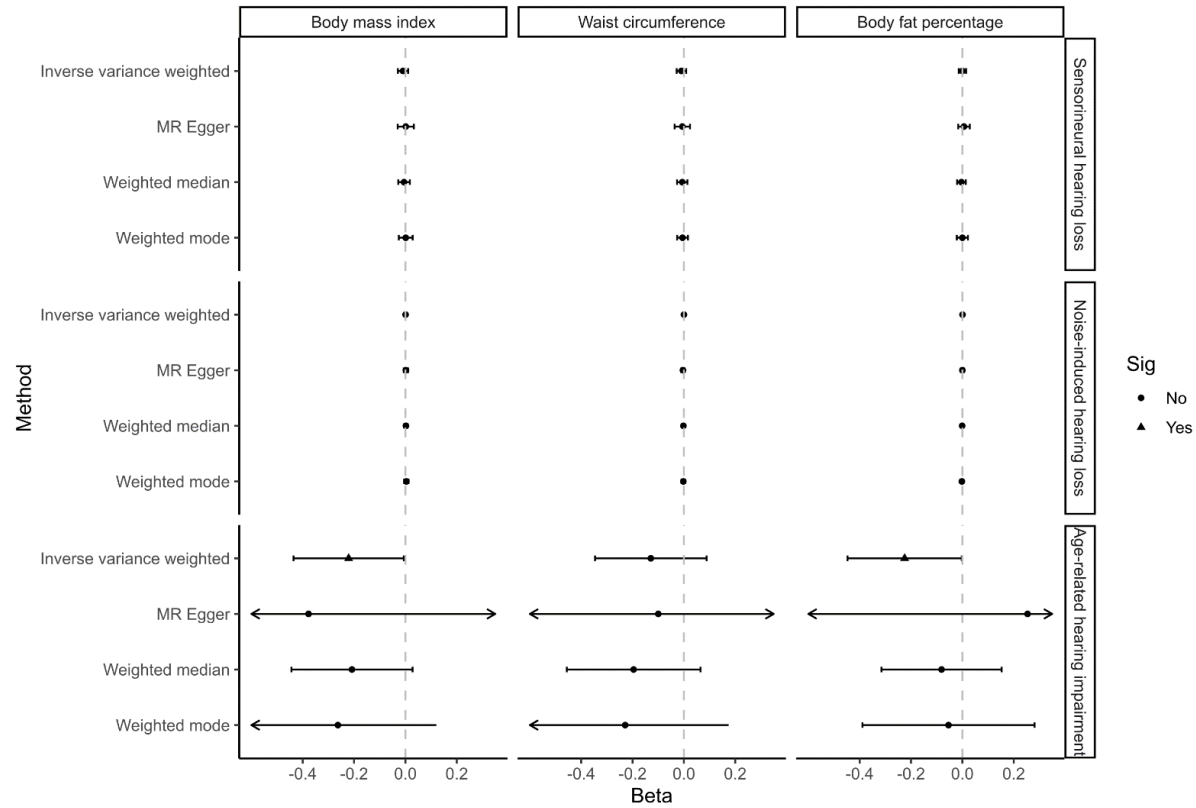

MR-Egger: Mendelian randomisation Egger. Sig: significance (p-value < 0.5). Effect sizes with 95% confidence interval. Arrows indicate  $-0.6 > \beta$  or  $\beta > 0.35$

**Supplementary Figure 3** Funnel plot for MR analysis of age-related hearing impairment and body mass index.

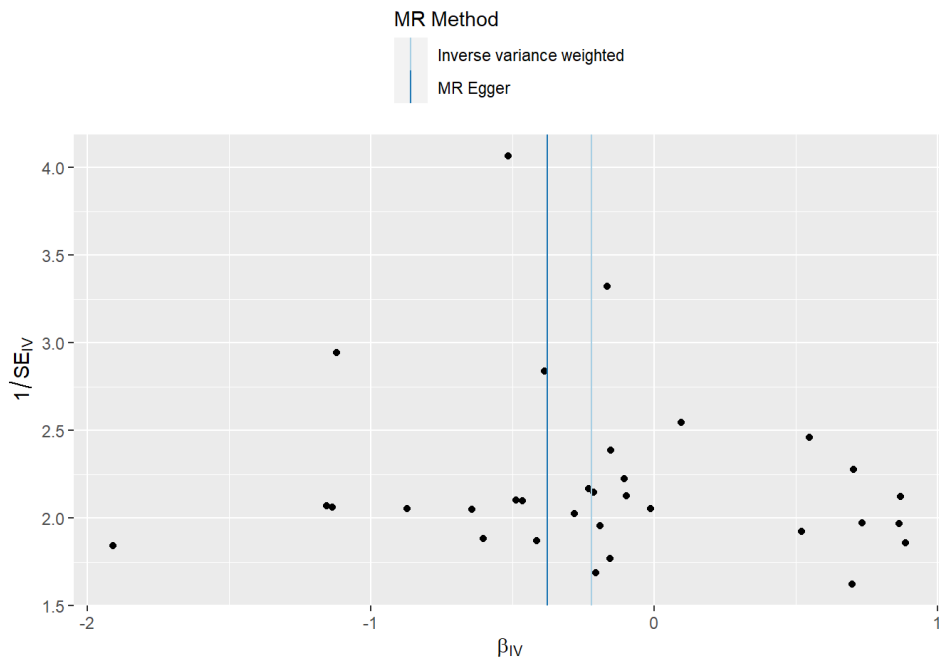

MR-Egger: Mendelian randomisation Egger

**Supplementary Figure 4** Leave-one-out analysis for age-related hearing impairment liability and body mass index

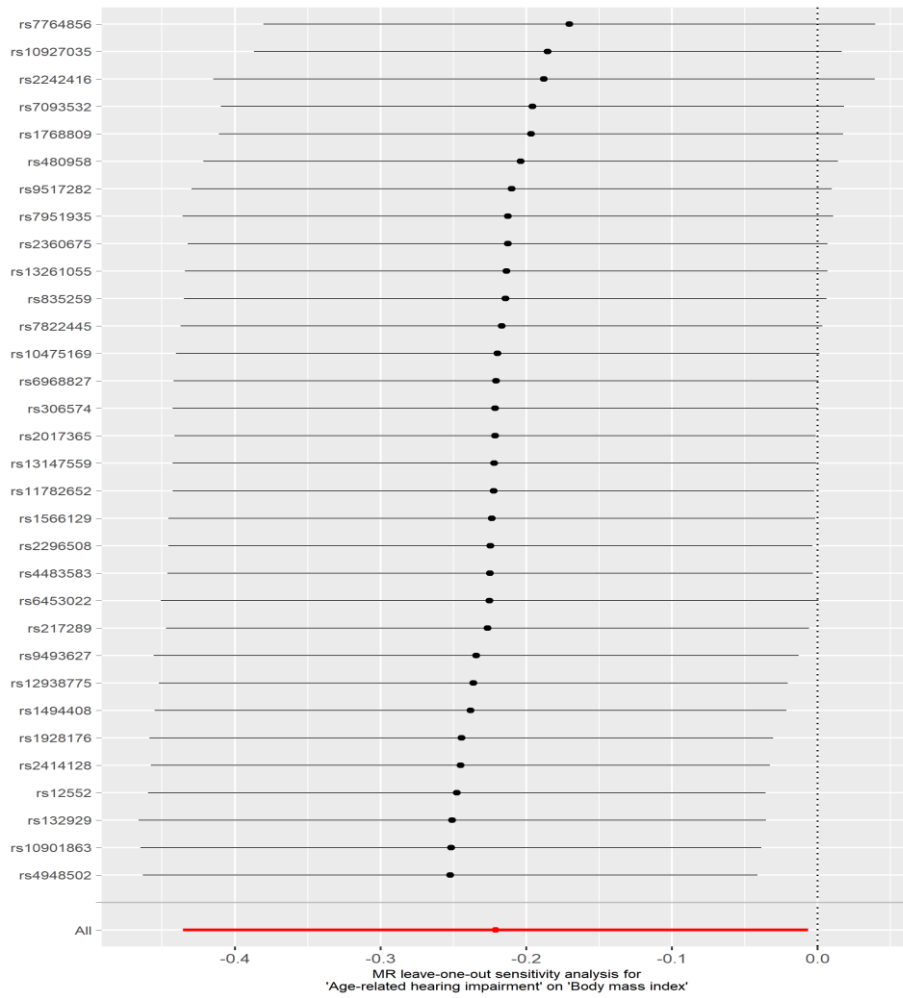

Effect size (x-axis) after leaving one instrumental variant (y-axis) out using inverse variance weighted method

**Supplementary Figure 5** Three scenarios of shared causal variant (colocalisation) between body mass index and age-related hearing impairment

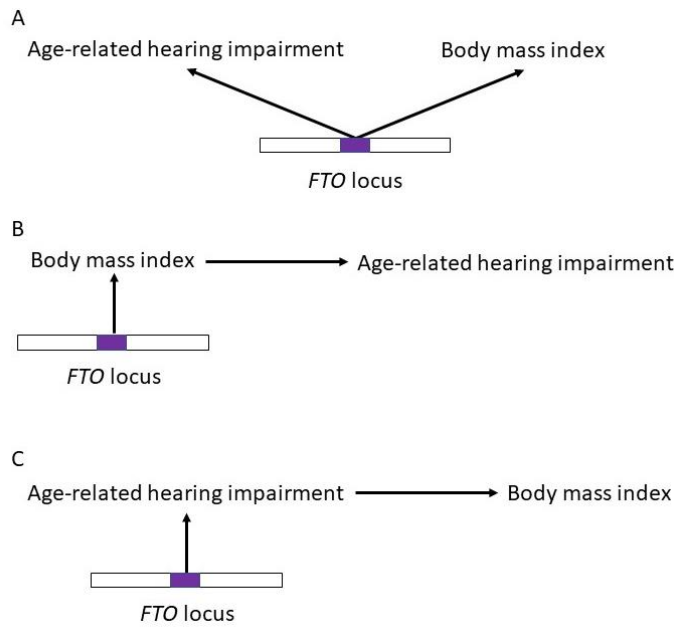

There are three possible scenarios of colocalisation between body mass index (BMI) and age-related hearing impairment (ARHI).

Panel A: two unrelated traits with a shared causal variant.

Panel B and C: two traits with a shared causal variant where the first trait influences the second trait, which are BMI influences ARHI and ARHI influences BMI.
